# Supplementary material for: Kinetic and mechanistic study on gas phase reactions of ozone with a series ofcis-3-hexenyl esters
Source: Royal Society of Chemistry journal article supplement (doi:10.1039/c7ra13369c), 2018-01-01
Supplement: c7ra13369c1.pdf [file c7ra13369c1.pdf]

## Supplementary Information

### **Kinetic and mechanism study on gas phase reactions of ozone with a series of *cis*-3-hexenyl esters**

**Qilei Zhang, ‡<sup>ab</sup> Xiaoxiao Lin, ‡<sup>a</sup> Yanbo Gai,<sup>\*a</sup> Qiao Ma,<sup>ab</sup> Weixiong Zhao,<sup>a</sup> Bo Fang,<sup>a</sup> Bo  
Long<sup>c</sup> and Weijun Zhang<sup>\*ad</sup>**

<sup>a</sup> *Laboratory of Atmospheric Physico-Chemistry, Anhui Institute of Optics and Fine  
Mechanics, Chinese Academy of Sciences, Hefei, 230031, Anhui, China*

<sup>b</sup> *University of Science and Technology of China, Hefei 230026, China*

<sup>c</sup> *School of Materials Science and Engineering, Guizhou Minzu University, Guiyang  
550025, China*

<sup>d</sup> *School of Environmental Science and Optoelectronic Technology, University of  
Science and Technology of China, Hefei, 230026, Anhui, China*

\* Corresponding author:

Dr. Yanbo Gai: [gaiyanbo@aiofm.ac.cn](mailto:gaiyanbo@aiofm.ac.cn)

Prof. Weijun Zhang: [wjzhang@aiofm.ac.cn](mailto:wjzhang@aiofm.ac.cn)

#### **SUMMARY:**

11 pages, including 12 figures and 1 tables.

## Figure Captions:

**Fig. S1** Schematic of the experimental setup and instrumentation

**Fig.S2** One example of comparative experiments in the reaction of O<sub>3</sub> with *cis*-3-hexenyl acetate with and without cyclohexane as OH scavenger.

**Fig. S3** Pseudo-first-order plots for O<sub>3</sub> reactions with different concentrations of Isoprene (in molecule cm<sup>-3</sup>).

**Fig. S4** Pseudo-first-order plots for O<sub>3</sub> reactions with different concentrations of *cis*-3-Hexenyl Formate (in molecule cm<sup>-3</sup>).

**Fig. S5** Pseudo-first-order plots for O<sub>3</sub> reactions with different concentrations of *cis*-3-Hexenyl propionate (in molecule cm<sup>-3</sup>).

**Fig. S6** Pseudo-first-order plots for O<sub>3</sub> reactions with different concentrations of *cis*-3-Hexenyl Butyrate (in molecule cm<sup>-3</sup>).

**Fig. S7** The structures for the reactants, transition states and products along the *cis*-3-hexenyl acetate + O<sub>3</sub> reaction profile.

**Fig. S8** The structures for the reactants, transition states and products along the *cis*-3-hexenyl propionate + O<sub>3</sub> reaction profile.

**Fig. S9** The structures for the reactants, transition states and products along the *cis*-3-hexenyl butyrate + O<sub>3</sub> reaction profile.

**Fig. S10** BHandHLYP/6-311+G(d,p) energy profile (in kJ mol<sup>-1</sup>) for the *cis*-3-hexenyl acetate ozonolysis.

**Fig. S11** BHandHLYP/6-311+G(d,p) energy profile (in kJ mol<sup>-1</sup>) for the *cis*-3-hexenyl propionate ozonolysis.

**Fig. S12** BHandHLYP/6-311+G(d,p) energy profile (in kJ mol<sup>-1</sup>) for the *cis*-3-hexenyl butyrate ozonolysis.

Fig.S1

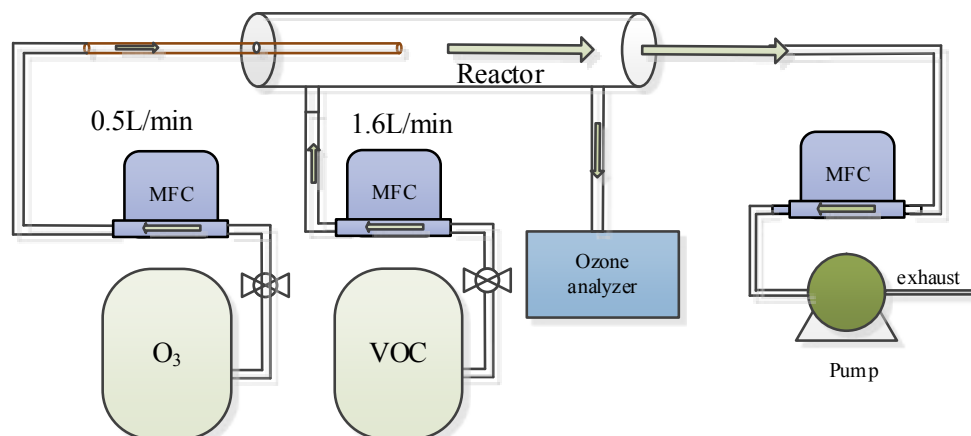

Fig. S2

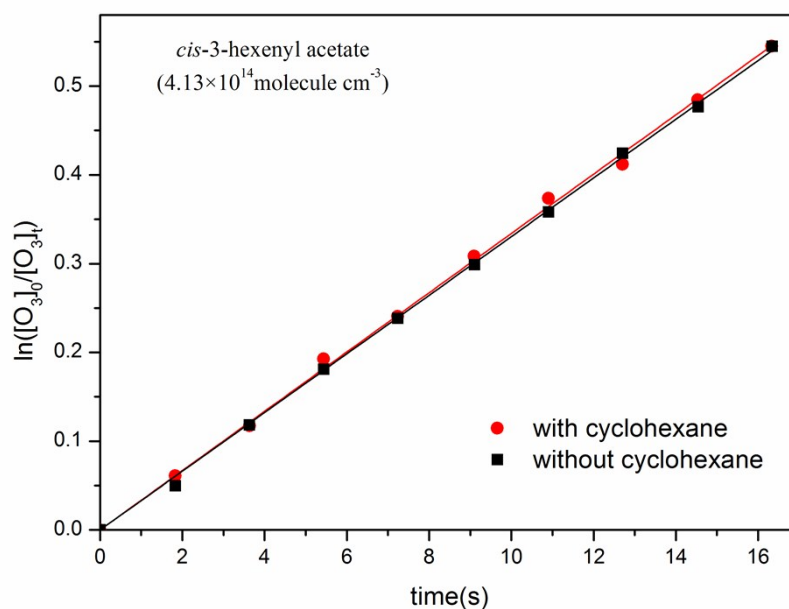

Comparative experiments with and without cyclohexane as OH scavenger were conducted, and no significant difference was found in the rate constants. Fig.S2 gives one example of comparative experiments in the reaction of  $O_3$  with  $4.13 \times 10^{14}$  molecule  $\text{cm}^{-3}$  *cis*-3-hexenyl acetate. As can be seen, regardless of the addition of excess cyclohexane ( $6.36 \times 10^{15}$  molecule  $\text{cm}^{-3}$ ) or not, the slope values of the lines ( $k'$ ) could be considered to be the same within the error.

Fig. S3

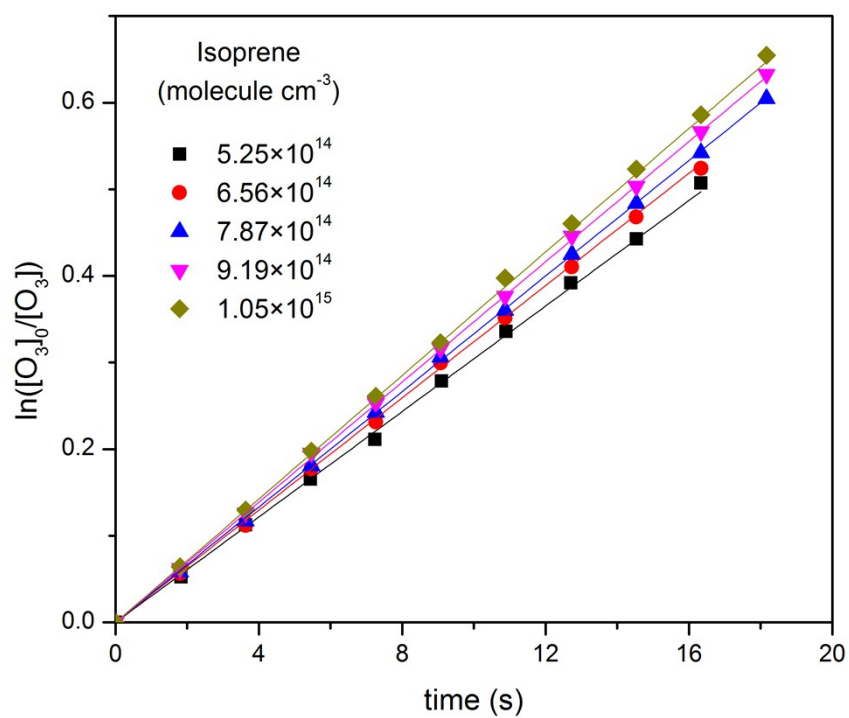

Fig. S4

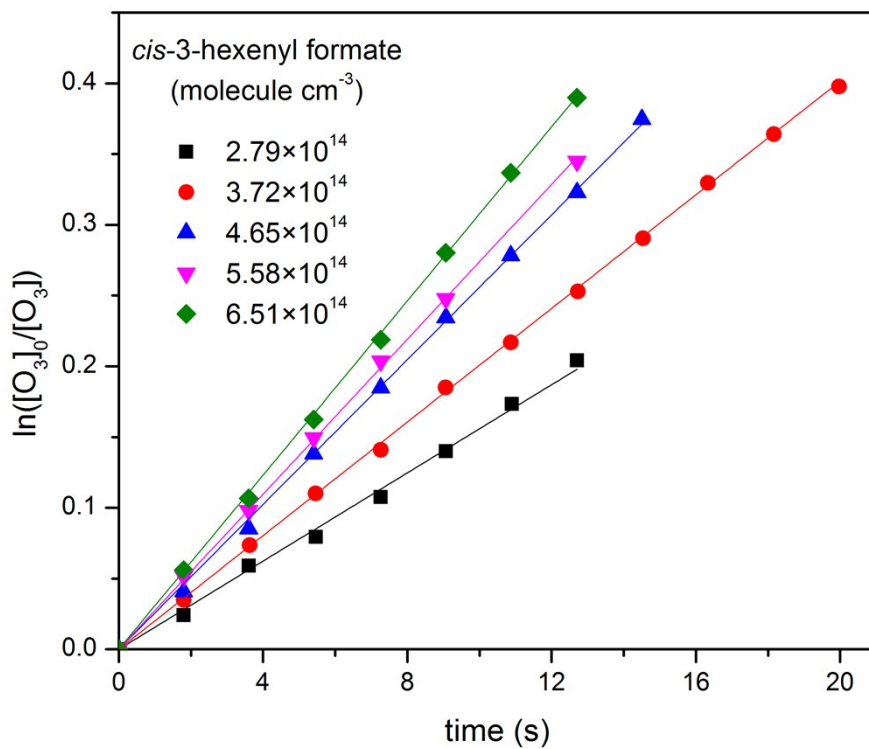

Fig. S5

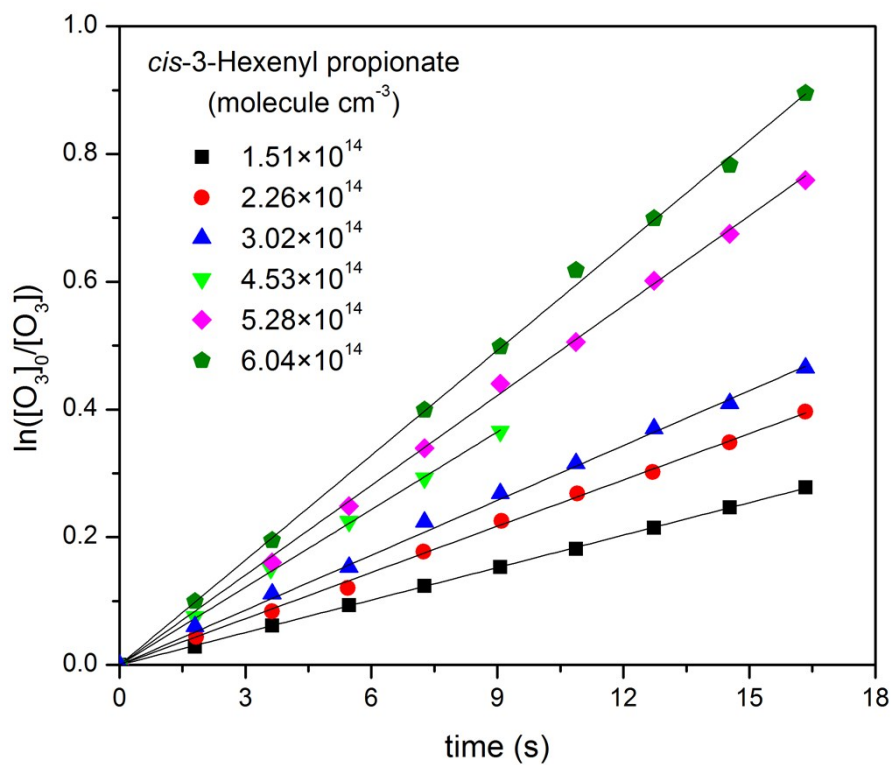

Fig.S6

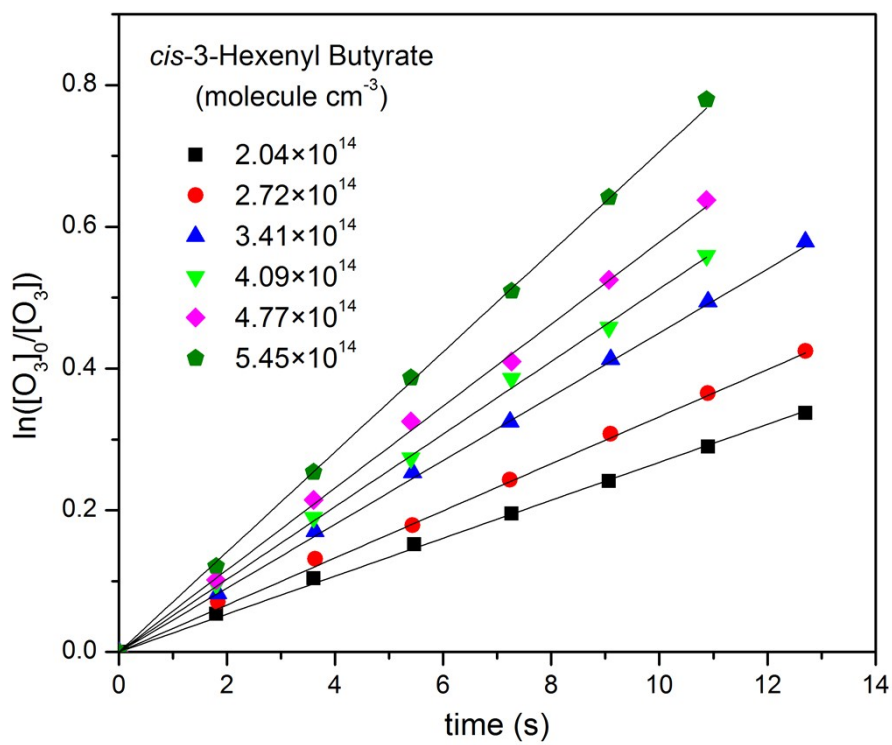

Fig. S7

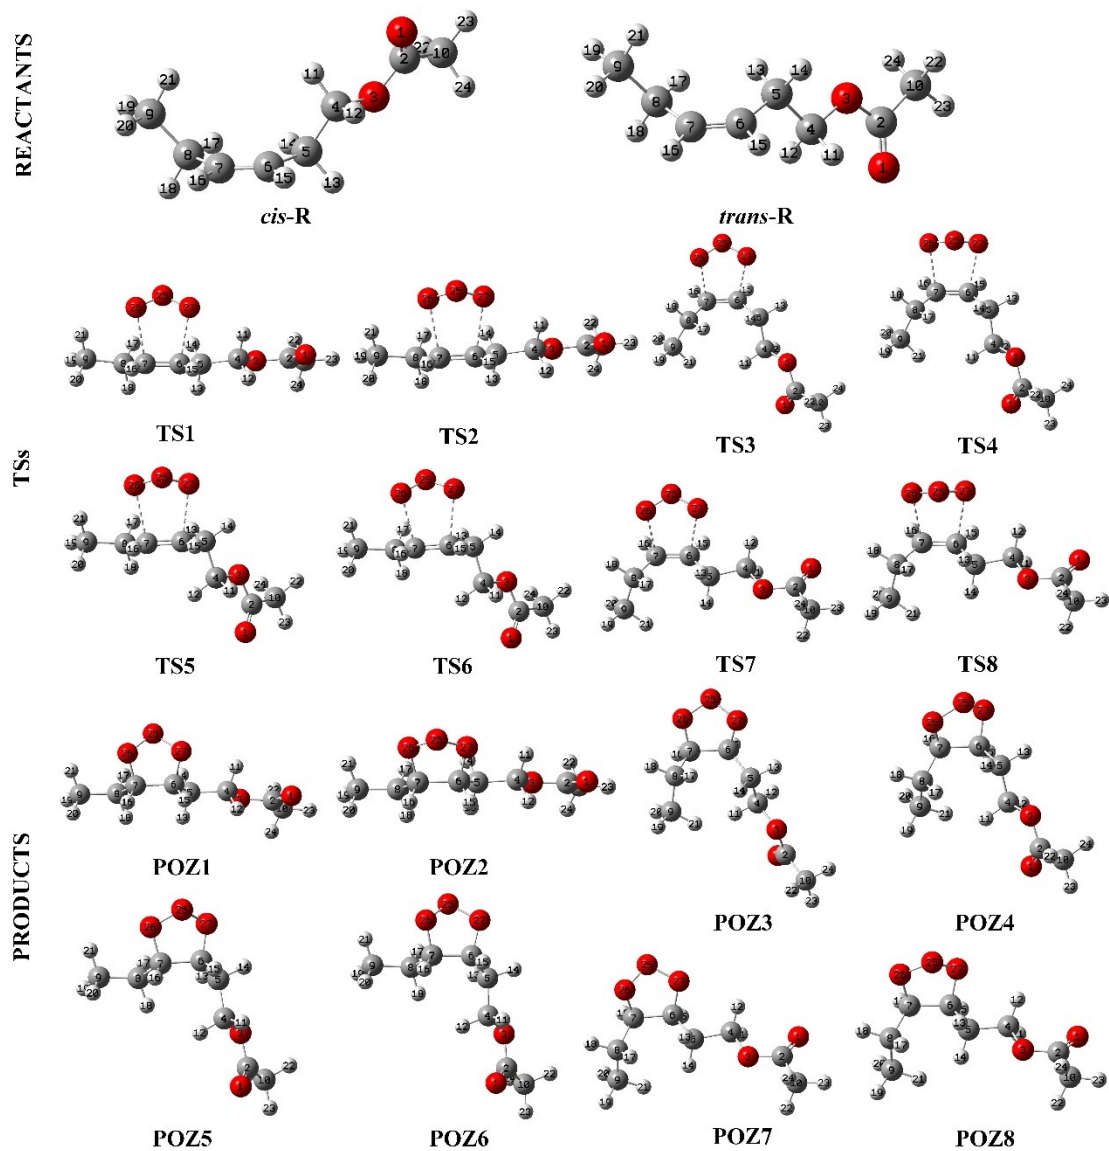

Fig.S8

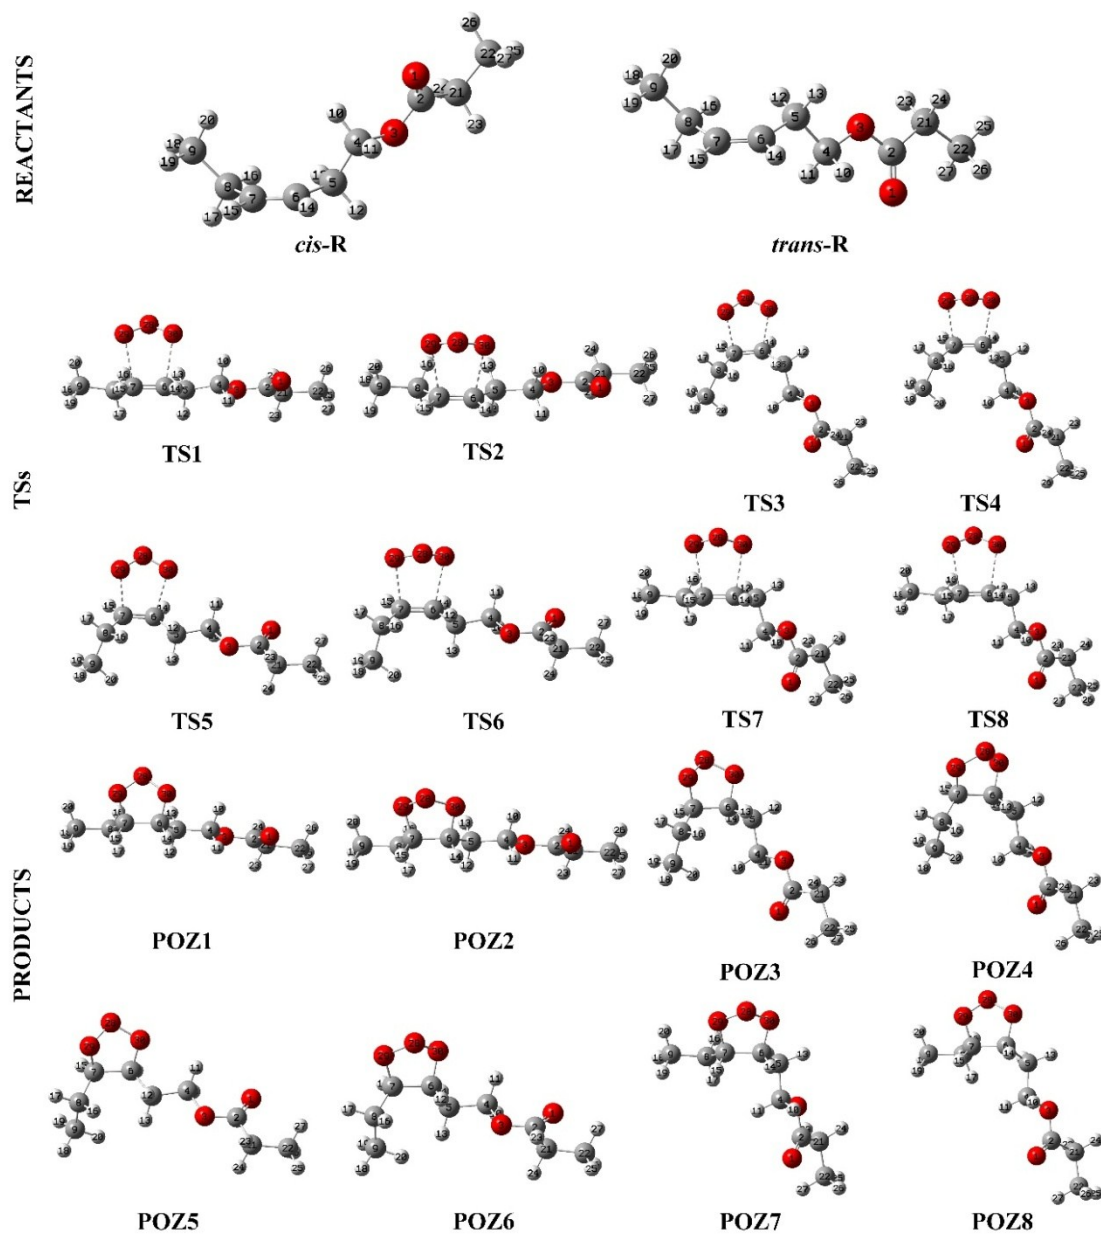

Fig.S9

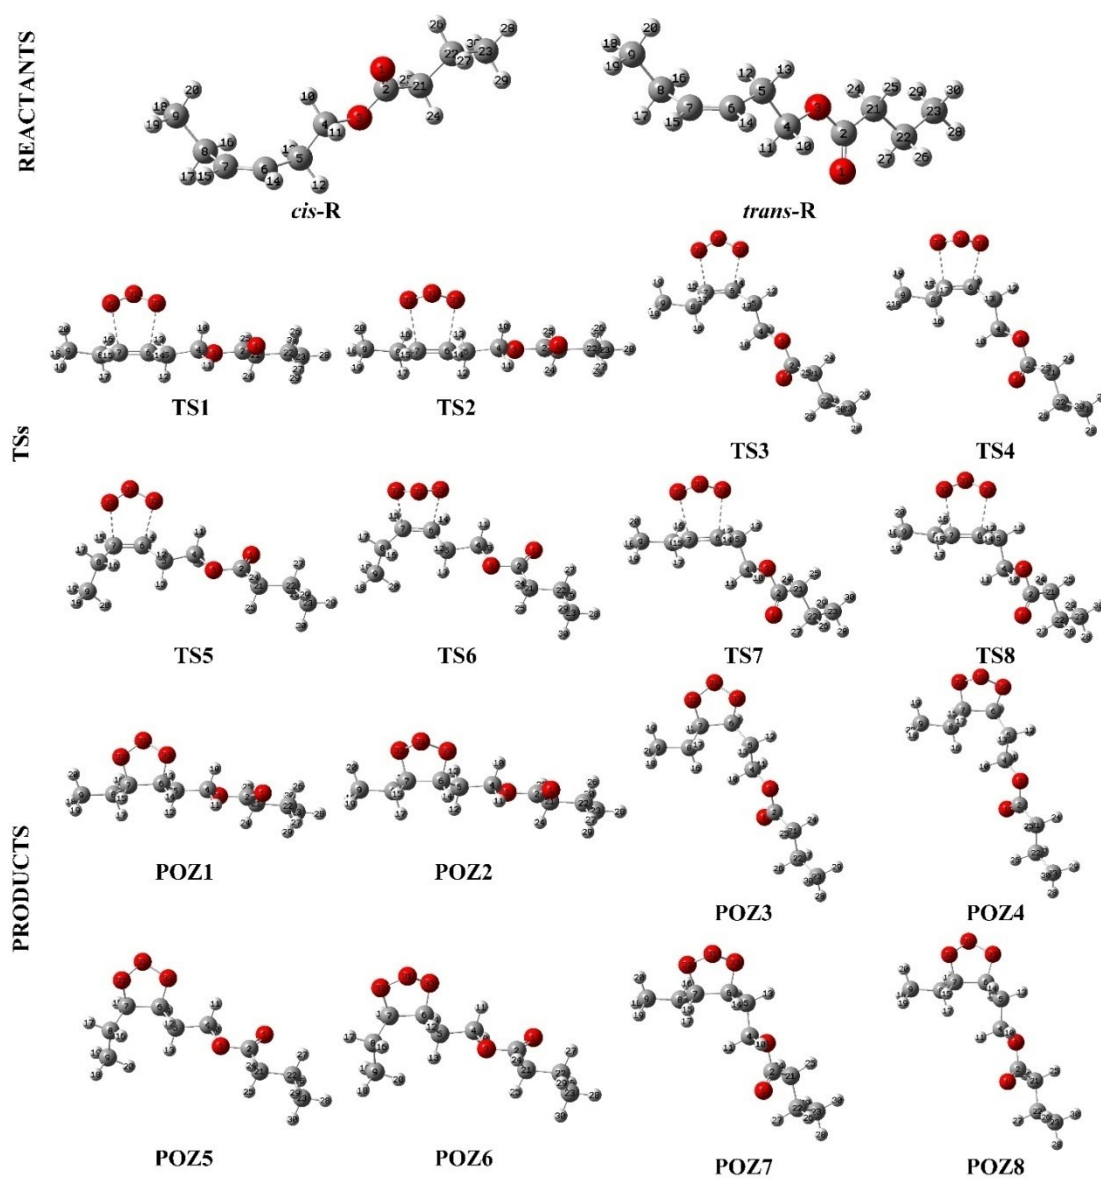



Fig.S10

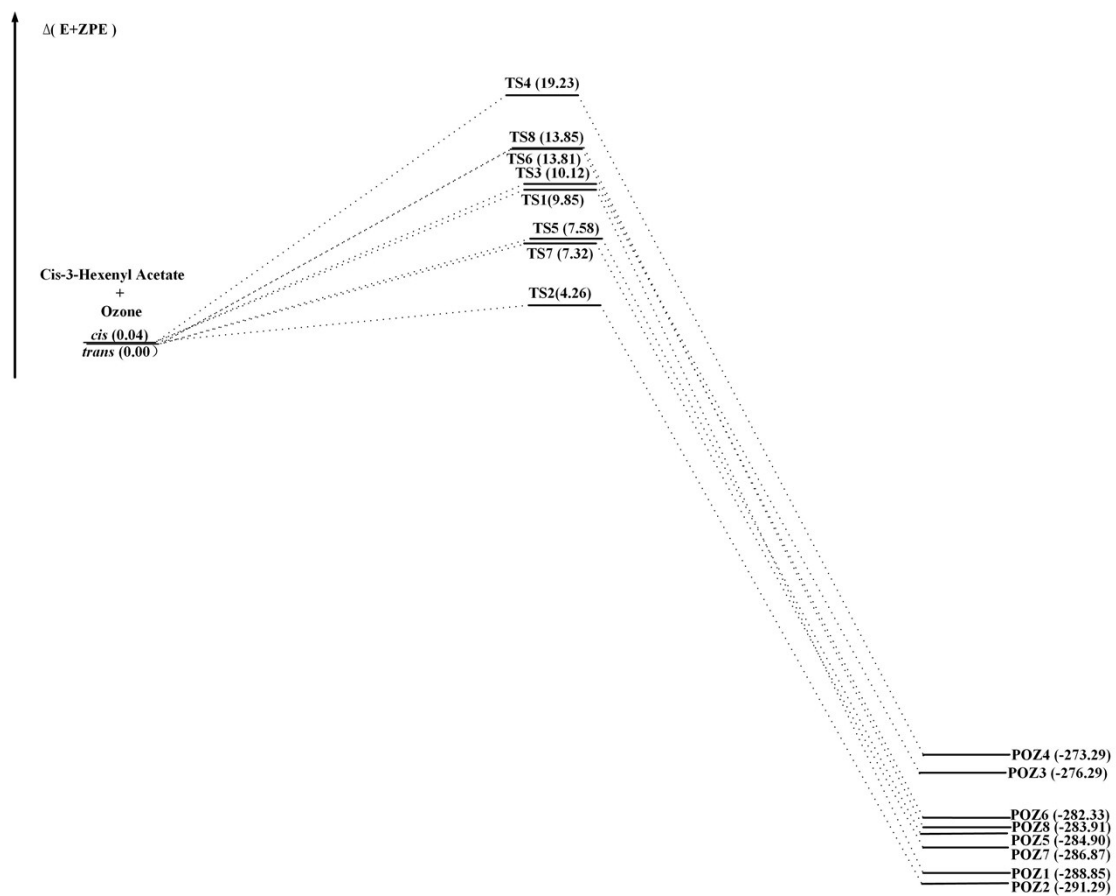

Fig.S11

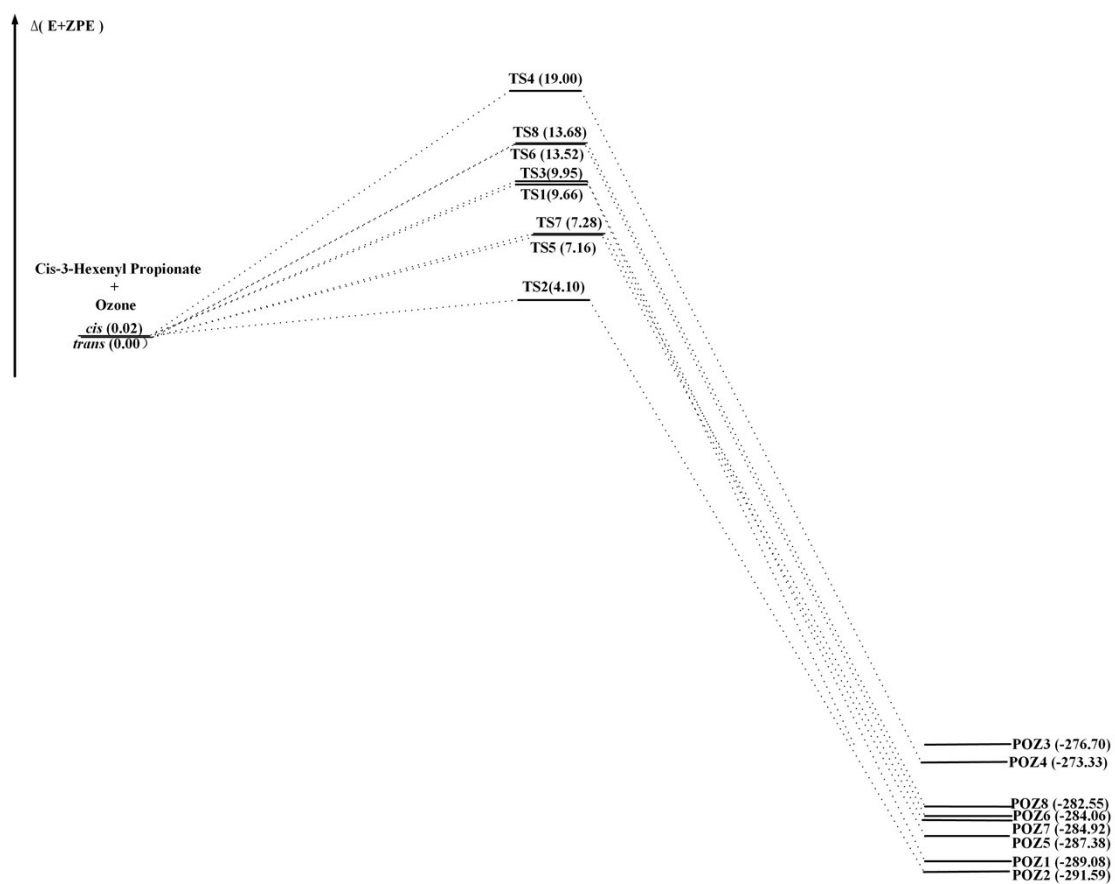

**Fig.S12**

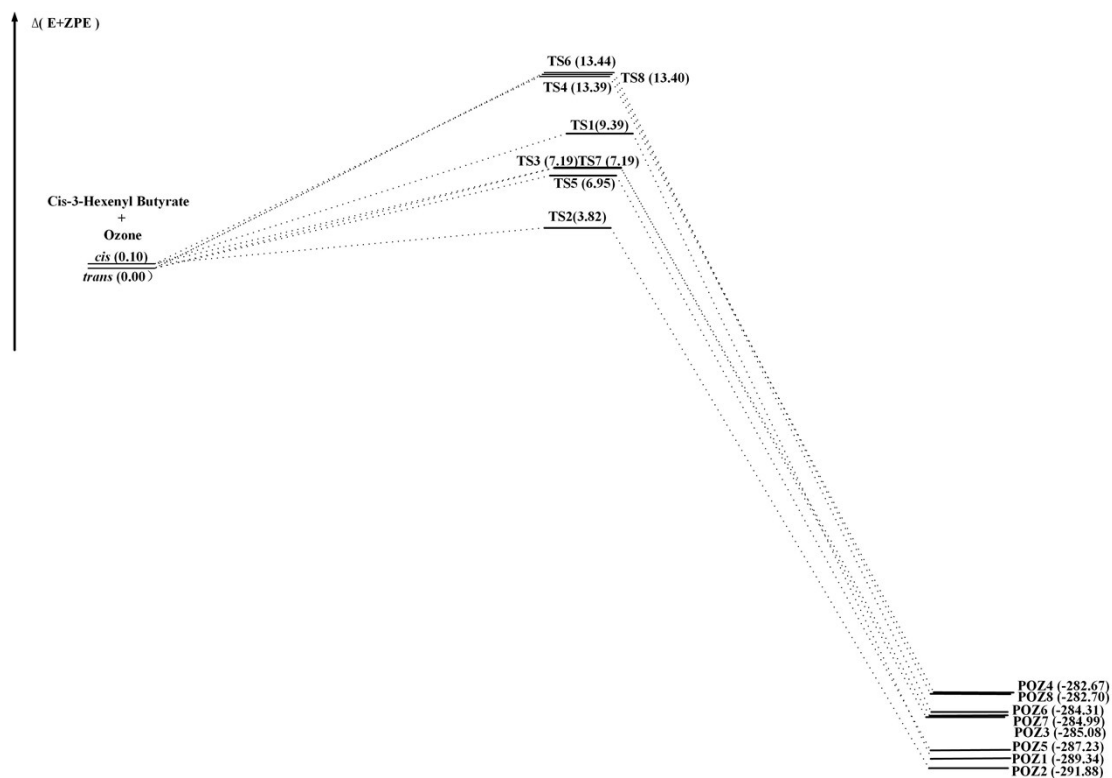

**Table S1** The HOMO energies of the unsaturated esters and the parent hexene calculated at HF/6-31G\*\* level of theory.

| Compounds                | HOMO energies                  |
|--------------------------|--------------------------------|
| cis-3-hexenyl formate    | -0.35465 Hartree (-9.65052 eV) |
| cis-3-hexenyl acetate    | -0.35205 Hartree (-9.57977 eV) |
| cis-3-hexenyl propionate | -0.35174 Hartree (-9.57133 eV) |
| cis-3-hexenyl butyrate   | -0.35159 Hartree (-9.56725 eV) |
| cis-3-hexene             | -0.34030 Hartree (-9.26003 eV) |
